# Supplementary material for: Anti-inflammatory effects of glycine thymosin β4 eye drops in experimental dry eye
Source: PubMed Central journal article supplement — Biomed Rep. 2020 Apr 2;12(6):319–25. doi: 10.3892/br.2020.1296 (PMC7201140; doi:10.3892/br.2020.1296), 2020-04-02

Figure S1. Preliminary experiments. (A) Mean tear volumes, (B) corneal staining scores and (C) percentage of CD4<sup>+</sup>/CCR5<sup>+</sup> T cells in the conjunctiva measured by flow cytometry in the EDE, BSS, 0.001% Gly-Tβ4, 0.01% Gly-Tβ4 and 0.1% Gly-Tβ4 groups. \*P<0.05 vs. EDE group; †P<0.05 vs. BSS group. EDE, experimental dry eye; BSS, balanced salt solution; Gly-Tβ4, glycine-thymosin β4.

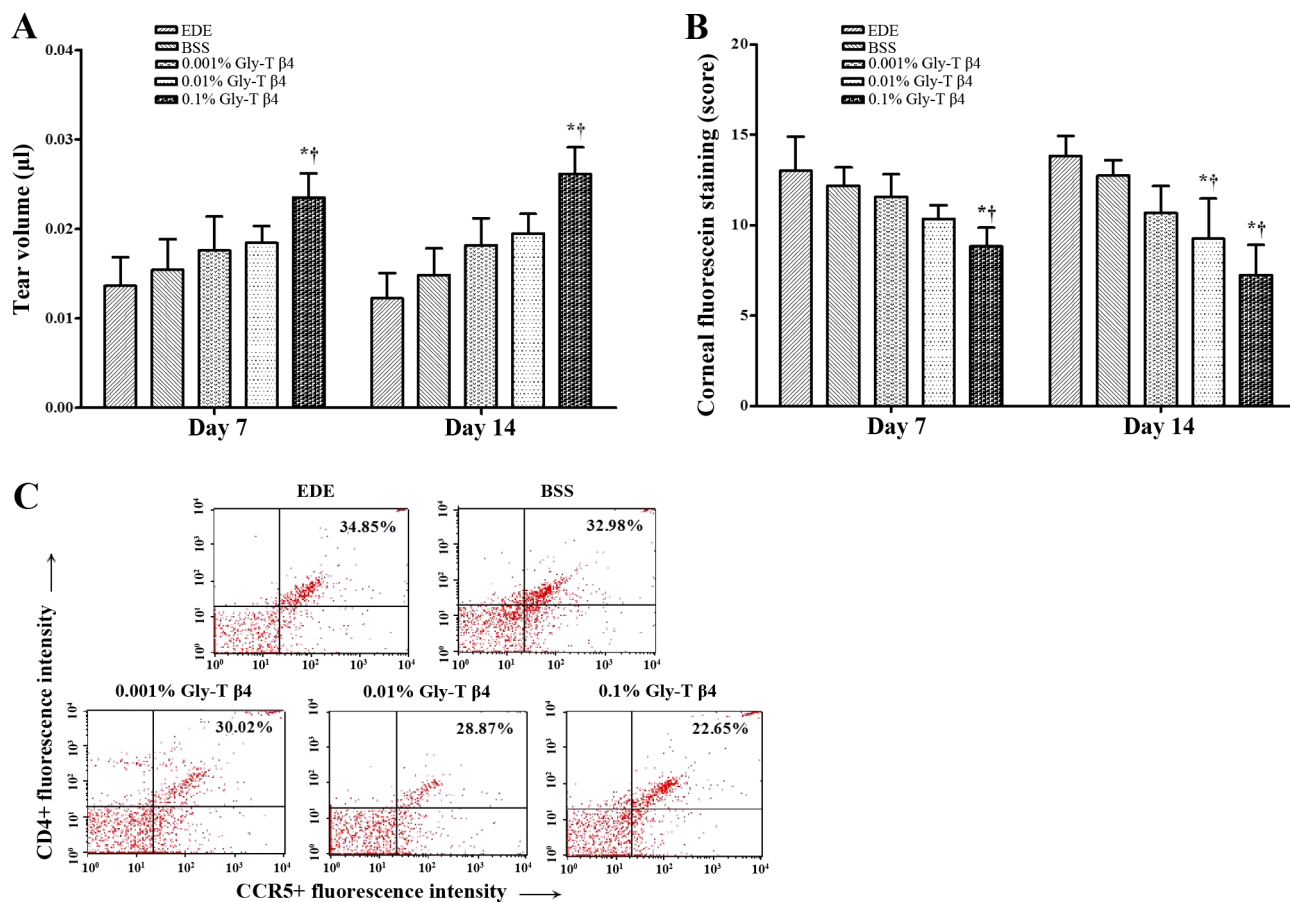

Supplement: Supplementary_Data.pdf [file Supplementary_Data.pdf]
